# Supplementary material
Source: PubMed Central journal article supplement (PMC4667795)
Supplement: NIHMS735432-supplement-Suppl_2.pdf [file NIHMS735432-supplement-Suppl_2.pdf]

|          | 1     | 20                                                                                                                                                                                                                                                                                                                                                                                                                                                                                                                                                                    | 86         |
|----------|-------|-----------------------------------------------------------------------------------------------------------------------------------------------------------------------------------------------------------------------------------------------------------------------------------------------------------------------------------------------------------------------------------------------------------------------------------------------------------------------------------------------------------------------------------------------------------------------|------------|
| BphP1-FP | (1)   | MVAGHASGSPAFGTASHSN <b>C</b> EEHIEHLAGSIQPHGALLVSE <b>H</b> DHRV <b>I</b> QASANAEEFLNLGS-VL-----VLGVPLAEI-DGDLLIKILPHLD-PT                                                                                                                                                                                                                                                                                                                                                                                                                                            |            |
| RpBphP1  | (1)   | MVAGHASGSPAFGTADLSN <b>C</b> EREEIHLAGSIQPHGALLVSEPDHRI <b>I</b> QASANAEEFLNLGS-VL-----VLGVPLAEI-DGDLLIKILPHLD-PT                                                                                                                                                                                                                                                                                                                                                                                                                                                     |            |
| iRFP682  | (1)   | -----MAEGSVARQPDLLT <b>C</b> DDEPIH <b>I</b> PGAIQPHGLLLALAADM <b>T</b> IVAGSDN <b>L</b> PELTGLAIG-AL-----IGRSAADVFDSETHNRLTIALAEPG                                                                                                                                                                                                                                                                                                                                                                                                                                   |            |
| RpBphP2  | (1)   | -----MTEGSVARQPDLS <b>T</b> CDDDEPIH <b>I</b> PGAIQPHGLLLALAADM <b>T</b> IVAGSDN <b>L</b> PELTGLAIG-AL-----IGRSAADVFDSETHNRLTIALAEPG                                                                                                                                                                                                                                                                                                                                                                                                                                  |            |
| iRFP670  | (1)   | -----MARKVDLTS <b>C</b> DREP <b>I</b> H <b>I</b> PGSIQPCGCLLACDAQAV <b>R</b> ITRITENAGAFFG <b>R</b> ET-PR-----VGELLADYF-GETEHALRNALAQ                                                                                                                                                                                                                                                                                                                                                                                                                                 |            |
| RpBphP6  | (1)   | -----MPRKVDLTS <b>C</b> DREP <b>I</b> H <b>I</b> PGSIQPCGCLLACDAQAV <b>R</b> ITRITENAGAFFG <b>R</b> ET-PR-----VGELLADYF-GETEHALRNALAQ                                                                                                                                                                                                                                                                                                                                                                                                                                 |            |
| DrBphP   | (5)   | PLPFFPPLYLGGPE <b>I</b> T <b>T</b> EN <b>C</b> EREPIH <b>I</b> PGSIQPHGALL <b>T</b> ADGHSGEVLQMSLN <b>A</b> ATFLGQEP-TV-----LRGQTLAALLPEQWPALQALPFGC                                                                                                                                                                                                                                                                                                                                                                                                                  |            |
| AtPhyA   | (50)  | RVTGPPVENQPPRSKVT <b>T</b> TYLHH <b>I</b> QKGK <b>L</b> IQPFGLLALDEK <b>T</b> FKV <b>I</b> AYSENASE <b>L</b> LMASHAVPSVGEHPVLG <b>I</b> GT <b>I</b> RS <b>L</b> FTAPSASALQKALGFGD                                                                                                                                                                                                                                                                                                                                                                                     |            |
| AtPhyB   | (84)  | SQSLK <b>T</b> TYGSSVPEQ <b>Q</b> ITAYLSR <b>I</b> Q <b>R</b> GGY <b>I</b> Q <b>P</b> FGCM <b>I</b> VADESS <b>F</b> RI <b>G</b> YSENARE <b>M</b> L <b>G</b> IMPQ <b>S</b> VPTLE <b>K</b> PE <b>L</b> AMGT <b>D</b> VR <b>S</b> L <b>F</b> TSSSS <b>I</b> LLER <b>A</b> VF <b>A</b> RE                                                                                                                                                                                                                                                                                 |            |
| Sy Cph1  | (1)   | -----MATTVQLSDQSLRQ <b>L</b> E <b>T</b> LAI <b>H</b> TA <b>H</b> L <b>I</b> Q <b>P</b> FG <b>M</b> V <b>V</b> LQ <b>E</b> PD <b>L</b> T <b>I</b> SQ <b>I</b> SAN <b>T</b> G <b>L</b> GR <b>S</b> PE <b>D</b> L-----LGR <b>T</b> L <b>G</b> EV <b>F</b> DS <b>F</b> Q <b>I</b> D <b>I</b> Q <b>S</b> R <b>L</b> T <b>A</b> G <b>Q</b>                                                                                                                                                                                                                                  |            |
| Cl CphA  | (1)   | -----MVSE <b>F</b> Q <b>A</b> Q <b>S</b> IN <b>V</b> NS <b>L</b> KE <b>A</b> A <b>H</b> VC <b>S</b> Q <b>I</b> Q <b>P</b> H <b>G</b> V <b>L</b> L <b>V</b> GE <b>P</b> EL <b>N</b> I <b>L</b> Q <b>I</b> SS <b>N</b> T <b>S</b> W <b>V</b> FG <b>I</b> L <b>P</b> ED <b>V</b> -----LQ <b>K</b> L <b>E</b> D <b>L</b> L <b>D</b> PF <b>Q</b> I <b>E</b> R <b>I</b> K <b>A</b> G <b>I</b> LE <b>G</b> N                                                                                                                                                                 |            |
|          |       | N-terminal extension of PAS domain                                                                                                                                                                                                                                                                                                                                                                                                                                                                                                                                    | PAS domain |
|          | 87    |                                                                                                                                                                                                                                                                                                                                                                                                                                                                                                                                                                       | 173        |
| BphP1-FP | (87)  | --AEGMPVAVRCRIGNPSTEY <b>C</b> GLMHRP <b>E</b> GG <b>L</b> I <b>E</b> LERAG <b>P</b> S <b>I</b> -----DL <b>S</b> GT <b>L</b> AP <b>A</b> LER <b>I</b> RTAG <b>S</b> LR <b>A</b> L <b>C</b> DD <b>T</b> V <b>L</b> LF <b>Q</b> Q-----CTGYDRVMVYR <b>F</b> D                                                                                                                                                                                                                                                                                                            |            |
| RpBphP1  | (87)  | --AEGMPVAVRCRIGNPSTEYDGLMHRP <b>E</b> GG <b>L</b> I <b>E</b> LERAG <b>P</b> P <b>I</b> -----DL <b>S</b> GT <b>L</b> AP <b>A</b> LER <b>I</b> RTAG <b>S</b> LR <b>A</b> L <b>C</b> DD <b>T</b> ALL <b>F</b> Q <b>Q</b> -----CTGYDRVMVYR <b>F</b> D                                                                                                                                                                                                                                                                                                                     |            |
| iRFP682  | (85)  | AAVG- <b>A</b> PI <b>T</b> VG <b>F</b> TM <b>R</b> KD <b>A</b> G-F <b>I</b> GS <b>W</b> HR <b>H</b> D- <b>Q</b> L <b>I</b> F <b>L</b> E <b>L</b> EP <b>P</b> Q <b>R</b> D <b>V</b> -----A <b>E</b> P <b>Q</b> A <b>F</b> FR <b>R</b> T <b>N</b> S <b>A</b> IR <b>R</b> L <b>Q</b> A <b>E</b> T <b>L</b> S <b>A</b> C <b>A</b> A <b>A</b> Q <b>E</b> V <b>R</b> K <b>I</b> T <b>G</b> F <b>D</b> R <b>V</b> M <b>I</b> Y <b>R</b> F <b>A</b>                                                                                                                           |            |
| RpBphP2  | (85)  | AAVG- <b>A</b> PI <b>A</b> VG <b>F</b> TM <b>R</b> KD <b>A</b> G-F <b>V</b> GS <b>W</b> HR <b>H</b> D- <b>Q</b> L <b>V</b> F <b>L</b> E <b>L</b> EP <b>P</b> Q <b>R</b> D <b>V</b> -----A <b>E</b> P <b>Q</b> A <b>F</b> FR <b>R</b> T <b>N</b> S <b>A</b> IR <b>R</b> L <b>Q</b> A <b>E</b> T <b>L</b> S <b>A</b> C <b>A</b> A <b>A</b> Q <b>E</b> V <b>R</b> E <b>I</b> T <b>G</b> F <b>D</b> R <b>V</b> M <b>I</b> Y <b>R</b> F <b>A</b>                                                                                                                           |            |
| iRFP670  | (79)  | SDPKR <b>P</b> AL <b>I</b> FGWRD <b>G</b> L <b>T</b> GR <b>T</b> FD <b>I</b> SL <b>H</b> R <b>H</b> D-G <b>T</b> S <b>I</b> E <b>F</b> E <b>P</b> A <b>A</b> A <b>E</b> Q-----A <b>D</b> N <b>P</b> --L <b>R</b> L <b>T</b> R <b>Q</b> I <b>A</b> R <b>T</b> K <b>E</b> L <b>K</b> S <b>L</b> E <b>E</b> M <b>A</b> A <b>R</b> V <b>P</b> R <b>Y</b> L <b>Q</b> A <b>M</b> L <b>G</b> Y <b>H</b> R <b>V</b> M <b>L</b> Y <b>R</b> F <b>A</b>                                                                                                                          |            |
| RpBphP6  | (79)  | SDPKR <b>P</b> AL <b>I</b> FGWRD <b>G</b> L <b>T</b> GR <b>T</b> FD <b>I</b> SL <b>H</b> R <b>H</b> D-G <b>T</b> S <b>I</b> E <b>V</b> E <b>F</b> P <b>A</b> A <b>A</b> D <b>Q</b> -----A <b>D</b> N <b>P</b> --L <b>R</b> L <b>T</b> R <b>Q</b> I <b>A</b> R <b>T</b> K <b>E</b> L <b>K</b> S <b>L</b> E <b>E</b> M <b>A</b> A <b>R</b> V <b>P</b> R <b>Y</b> L <b>Q</b> A <b>M</b> L <b>G</b> Y <b>H</b> R <b>V</b> M <b>L</b> Y <b>R</b> F <b>A</b>                                                                                                                |            |
| DrBphP   | (94)  | PDALQYR <b>A</b> T <b>L</b> D <b>W</b> P <b>A</b> A <b>G</b> H---L <b>S</b> L <b>T</b> V <b>H</b> R <b>V</b> G <b>E</b> -L <b>L</b> I <b>E</b> F <b>E</b> P <b>T</b> E <b>A</b> W <b>D</b> -----S <b>T</b> G <b>P</b> H <b>A</b> L <b>R</b> N <b>A</b> M <b>F</b> A <b>L</b> E <b>S</b> A <b>P</b> N <b>L</b> R <b>A</b> L <b>A</b> E <b>V</b> A <b>T</b> Q <b>T</b> ---V <b>R</b> E <b>L</b> T <b>G</b> F <b>D</b> R <b>V</b> M <b>L</b> Y <b>K</b> F <b>A</b>                                                                                                       |            |
| AtPhyA   | (151) | V <b>S</b> LL <b>N</b> P <b>I</b> L <b>V</b> C <b>R</b> T <b>S</b> A <b>K</b> P---F <b>Y</b> A <b>I</b> I <b>H</b> R <b>V</b> T-G <b>S</b> I <b>I</b> D <b>F</b> E <b>P</b> V <b>K</b> P <b>Y</b> E <b>V</b> P <b>M</b> T <b>A</b> A <b>G</b> A <b>L</b> Q <b>S</b> Y <b>K</b> L <b>A</b> A <b>K</b> A <b>I</b> T <b>R</b> L <b>Q</b> S <b>L</b> P <b>S</b> G <b>S</b> M <b>E</b> R <b>L</b> C <b>D</b> T <b>M</b> V <b>Q</b> E <b>V</b> F <b>E</b> L <b>T</b> G <b>Y</b> D <b>R</b> V <b>M</b> A <b>Y</b> K <b>F</b> H                                               |            |
| AtPhyB   | (185) | I <b>T</b> LL <b>N</b> P <b>V</b> W <b>I</b> H <b>S</b> K <b>N</b> T <b>G</b> K <b>P</b> ---F <b>Y</b> A <b>L</b> L <b>H</b> R <b>I</b> D-V <b>G</b> V <b>V</b> I <b>D</b> L <b>E</b> P <b>A</b> R <b>T</b> E <b>D</b> P <b>A</b> L <b>S</b> I <b>A</b> G <b>A</b> V <b>Q</b> S <b>Q</b> K <b>L</b> A <b>V</b> R <b>A</b> I <b>S</b> Q <b>L</b> Q <b>A</b> L <b>P</b> G <b>G</b> D <b>I</b> K <b>L</b> L <b>C</b> D <b>T</b> V <b>V</b> E <b>S</b> V <b>R</b> D <b>L</b> T <b>G</b> Y <b>D</b> R <b>V</b> M <b>V</b> K <b>F</b> H                                     |            |
| Sy Cph1  | (86)  | I <b>S</b> LL <b>N</b> P <b>S</b> K <b>L</b> W <b>A</b> R <b>V</b> M <b>G</b> D <b>D</b> F <b>V</b> I <b>D</b> G <b>V</b> F <b>H</b> R <b>N</b> S <b>D</b> GL <b>L</b> V <b>C</b> E <b>L</b> E <b>P</b> A <b>T</b> S <b>D</b> N <b>L</b> P <b>F</b> L <b>G</b> F <b>Y</b> H <b>M</b> A <b>A</b> L <b>N</b> R-L <b>R</b> Q <b>A</b> N---L <b>R</b> D <b>F</b> Y <b>D</b> V <b>I</b> V <b>E</b> --E <b>V</b> R <b>R</b> M <b>T</b> G <b>F</b> D <b>R</b> V <b>M</b> L <b>Y</b> R <b>F</b> D                                                                             |            |
| Cl CphA  | (86)  | L <b>D</b> Y <b>I</b> N <b>P</b> T <b>K</b> I <b>W</b> R <b>K</b> G <b>D</b> E <b>Y</b> V <b>V</b> F <b>A</b> D <b>F</b> H <b>R</b> N <b>E</b> GL <b>L</b> I <b>L</b> E <b>L</b> E <b>P</b> A <b>I</b> S <b>Q</b> E <b>N</b> I <b>P</b> F <b>L</b> S <b>F</b> Y <b>H</b> L <b>A</b> R <b>A</b> S <b>I</b> N <b>Q</b> -L <b>E</b> K <b>T</b> T <b>N</b> ---L <b>R</b> D <b>F</b> C <b>Q</b> I <b>V</b> Q---E <b>V</b> R <b>K</b> V <b>T</b> G <b>F</b> D <b>R</b> V <b>M</b> L <b>Y</b> K <b>F</b> D                                                                   |            |
|          |       | PAS domain                                                                                                                                                                                                                                                                                                                                                                                                                                                                                                                                                            | GAF domain |
|          | 174   |                                                                                                                                                                                                                                                                                                                                                                                                                                                                                                                                                                       | 253        |
| BphP1-FP | (174) | E <b>Q</b> GH <b>G</b> L <b>V</b> F <b>E</b> S <b>C</b> H <b>V</b> P <b>G</b> L <b>E</b> S <b>Y</b> F <b>G</b> N <b>R</b> Y <b>P</b> S <b>S</b> <b>T</b> V <b>P</b> Q <b>M</b> A <b>R</b> Q <b>L</b> Y <b>V</b> R <b>Q</b> R <b>V</b> R <b>V</b> L <b>D</b> V <b>T</b> Y <b>Q</b> P <b>V</b> P <b>L</b> E <b>P</b> R <b>L</b> S <b>P</b> L <b>T</b> G <b>R</b> D <b>L</b> D <b>M</b> S <b>G</b> C <b>F</b> L <b>R</b> S <b>M</b> S <b>P</b> C <b>H</b> L <b>Q</b> Y <b>L</b> K <b>M</b> D <b>M</b> G <b>V</b> R <b>A</b> T <b>L</b> A <b>V</b> S <b>L</b> V           |            |
| RpBphP1  | (174) | E <b>Q</b> GH <b>G</b> E <b>V</b> F <b>S</b> E <b>R</b> H <b>V</b> P <b>G</b> L <b>E</b> S <b>Y</b> F <b>G</b> N <b>R</b> Y <b>P</b> S <b>S</b> D <b>I</b> P <b>Q</b> M <b>A</b> R <b>R</b> L <b>Y</b> E <b>R</b> Q <b>R</b> V <b>R</b> V <b>L</b> D <b>V</b> S <b>Y</b> Q <b>P</b> V <b>P</b> L <b>E</b> P <b>R</b> L <b>S</b> P <b>L</b> T <b>G</b> R <b>D</b> L <b>D</b> M <b>S</b> G <b>C</b> F <b>L</b> R <b>S</b> M <b>S</b> P <b>I</b> H <b>L</b> Q <b>Y</b> L <b>K</b> N <b>M</b> G <b>V</b> R <b>A</b> T <b>L</b> V <b>S</b> L <b>V</b>                      |            |
| iRFP682  | (175) | S <b>D</b> F <b>S</b> G <b>V</b> V <b>I</b> A <b>E</b> D <b>R</b> C <b>A</b> E <b>V</b> E <b>S</b> K <b>L</b> G <b>L</b> H <b>Y</b> P <b>A</b> S <b>A</b> V <b>P</b> A <b>Q</b> A <b>R</b> R <b>L</b> Y <b>T</b> I <b>N</b> P <b>V</b> R <b>I</b> I <b>P</b> D <b>I</b> N <b>Y</b> R <b>P</b> V <b>P</b> V <b>T</b> P <b>D</b> L <b>N</b> P <b>V</b> T <b>G</b> R <b>P</b> I <b>D</b> L <b>S</b> F <b>A</b> I <b>L</b> R <b>S</b> V <b>S</b> P <b>C</b> H <b>L</b> E <b>F</b> M <b>R</b> N <b>I</b> G <b>M</b> H <b>G</b> T <b>M</b> S <b>I</b> S <b>I</b> L <b>R</b> |            |
| RpBphP2  | (175) | S <b>D</b> F <b>S</b> G <b>E</b> V <b>I</b> A <b>E</b> D <b>R</b> C <b>A</b> E <b>V</b> E <b>S</b> L <b>G</b> L <b>H</b> F <b>P</b> A <b>S</b> D <b>I</b> P <b>A</b> Q <b>A</b> R <b>R</b> L <b>Y</b> T <b>I</b> N <b>P</b> V <b>R</b> I <b>I</b> P <b>D</b> I <b>N</b> Y <b>R</b> P <b>V</b> P <b>V</b> T <b>P</b> D <b>L</b> N <b>P</b> V <b>T</b> G <b>R</b> P <b>I</b> D <b>L</b> S <b>F</b> A <b>I</b> L <b>R</b> S <b>V</b> S <b>P</b> V <b>H</b> L <b>E</b> Y <b>M</b> R <b>N</b> I <b>G</b> M <b>H</b> G <b>T</b> M <b>S</b> I <b>S</b> I <b>L</b> R          |            |
| iRFP670  | (169) | D <b>D</b> G <b>S</b> G <b>M</b> V <b>I</b> G <b>E</b> A <b>K</b> R <b>S</b> D <b>L</b> E <b>S</b> F <b>L</b> G <b>Q</b> H <b>F</b> P <b>A</b> S <b>L</b> V <b>P</b> Q <b>A</b> R <b>L</b> L <b>Y</b> L <b>K</b> N <b>A</b> I <b>R</b> V <b>S</b> D <b>S</b> R <b>G</b> I <b>S</b> S <b>R</b> I <b>V</b> E <b>H</b> -D <b>A</b> S <b>G</b> A <b>A</b> L <b>D</b> L <b>S</b> F <b>A</b> H <b>L</b> R <b>S</b> I <b>S</b> P <b>C</b> H <b>L</b> E <b>F</b> L <b>R</b> N <b>M</b> G <b>V</b> S <b>A</b> S <b>M</b> S <b>L</b> S <b>I</b> I                               |            |
| RpBphP6  | (169) | D <b>D</b> G <b>S</b> G <b>K</b> V <b>I</b> G <b>E</b> A <b>K</b> R <b>S</b> D <b>L</b> E <b>S</b> F <b>L</b> G <b>Q</b> H <b>F</b> P <b>A</b> S <b>D</b> I <b>P</b> Q <b>A</b> R <b>L</b> L <b>Y</b> L <b>K</b> N <b>A</b> I <b>R</b> V <b>S</b> D <b>S</b> R <b>G</b> I <b>S</b> S <b>R</b> I <b>V</b> P <b>E</b> R-D <b>A</b> S <b>G</b> A <b>A</b> L <b>D</b> L <b>S</b> F <b>A</b> H <b>L</b> R <b>S</b> V <b>S</b> P <b>I</b> H <b>L</b> E <b>Y</b> L <b>R</b> N <b>M</b> G <b>V</b> S <b>A</b> S <b>M</b> S <b>L</b> S <b>I</b> I                              |            |
| DrBphP   | (180) | P <b>D</b> A <b>T</b> G <b>E</b> V <b>I</b> A <b>E</b> A <b>R</b> E <b>G</b> L <b>H</b> A <b>F</b> L <b>G</b> H <b>R</b> F <b>P</b> A <b>S</b> D <b>I</b> P <b>A</b> Q <b>A</b> R <b>A</b> L <b>Y</b> T <b>R</b> H <b>L</b> L <b>R</b> L <b>T</b> A <b>D</b> T <b>R</b> A <b>A</b> A <b>V</b> P <b>L</b> D <b>P</b> V <b>L</b> N <b>P</b> Q <b>T</b> N <b>A</b> P <b>T</b> P <b>L</b> G <b>A</b> V <b>L</b> R <b>A</b> T <b>S</b> P <b>M</b> H <b>Q</b> Y <b>L</b> R <b>N</b> M <b>G</b> V <b>S</b> L <b>S</b> V <b>S</b> V <b>V</b>                                  |            |
| AtPhyA   | (247) | E <b>D</b> D <b>H</b> G <b>E</b> V <b>V</b> E <b>V</b> T <b>K</b> P <b>G</b> L <b>E</b> P <b>Y</b> L <b>G</b> L <b>H</b> Y <b>P</b> A <b>D</b> I <b>P</b> Q <b>A</b> R <b>F</b> L <b>M</b> R <b>N</b> K <b>V</b> R <b>M</b> I <b>V</b> D <b>C</b> N <b>A</b> K <b>H</b> A <b>R</b> V <b>L</b> Q <b>D</b> E---K <b>L</b> S <b>F</b> D <b>L</b> F <b>L</b> C <b>G</b> S <b>T</b> L <b>R</b> A <b>F</b> H <b>S</b> C <b>H</b> L <b>Q</b> Y <b>M</b> A <b>N</b> M <b>D</b> S <b>I</b> A <b>S</b> L <b>V</b> M <b>A</b> V <b>V</b>                                         |            |
| AtPhyB   | (281) | E <b>D</b> E <b>H</b> G <b>E</b> V <b>V</b> A <b>E</b> S <b>K</b> R <b>D</b> D <b>L</b> E <b>P</b> Y <b>I</b> G <b>L</b> H <b>Y</b> P <b>A</b> D <b>I</b> P <b>Q</b> A <b>S</b> R <b>F</b> L <b>K</b> Q <b>N</b> R <b>V</b> R <b>M</b> I <b>V</b> D <b>C</b> N <b>A</b> T <b>P</b> V <b>L</b> V <b>V</b> Q <b>D</b> D---R <b>L</b> T <b>Q</b> S <b>M</b> C <b>L</b> V <b>G</b> S <b>T</b> L <b>R</b> A <b>P</b> H <b>G</b> C <b>H</b> S <b>Q</b> Y <b>M</b> A <b>N</b> M <b>G</b> S <b>I</b> A <b>S</b> L <b>A</b> M <b>A</b> V <b>I</b>                              |            |
| Sy Cph1  | (180) | E <b>N</b> N <b>H</b> G <b>D</b> V <b>I</b> A <b>E</b> D <b>K</b> R <b>D</b> D <b>M</b> E <b>P</b> Y <b>L</b> G <b>L</b> H <b>Y</b> P <b>E</b> S <b>D</b> I <b>P</b> Q <b>A</b> R <b>R</b> L <b>F</b> I <b>H</b> N <b>P</b> I <b>R</b> V <b>I</b> P <b>D</b> V <b>Y</b> G <b>V</b> A <b>V</b> P <b>L</b> T <b>P</b> A <b>V</b> N <b>P</b> S <b>T</b> N <b>R</b> A <b>V</b> D <b>L</b> T <b>E</b> S <b>I</b> L <b>R</b> S <b>A</b> H <b>C</b> H <b>L</b> T <b>Y</b> L <b>K</b> N <b>M</b> G <b>V</b> G <b>A</b> S <b>L</b> T <b>I</b> S <b>L</b> I <b>K</b>            |            |
| Cl CphA  | (180) | D <b>D</b> G <b>H</b> G <b>S</b> V <b>I</b> A <b>E</b> E <b>K</b> L <b>D</b> S <b>M</b> E <b>P</b> Y <b>L</b> G <b>L</b> H <b>Y</b> P <b>E</b> S <b>D</b> I <b>P</b> K <b>P</b> A <b>R</b> K <b>L</b> F <b>A</b> S <b>N</b> F <b>I</b> R <b>L</b> I <b>P</b> D <b>A</b> H <b>A</b> E <b>P</b> Q <b>I</b> L <b>P</b> I <b>N</b> H <b>P</b> S <b>Q</b> Q <b>P</b> I <b>D</b> L <b>T</b> N <b>S</b> I <b>L</b> R <b>T</b> A <b>A</b> N <b>C</b> H <b>L</b> E <b>Y</b> L <b>H</b> N <b>M</b> G <b>V</b> G <b>A</b> S <b>L</b> T <b>I</b> S <b>L</b> I <b>K</b>            |            |
|          |       | GAF domain                                                                                                                                                                                                                                                                                                                                                                                                                                                                                                                                                            |            |
|          | 274   |                                                                                                                                                                                                                                                                                                                                                                                                                                                                                                                                                                       | 315        |
| BphP1-FP | (274) | G <b>G</b> -----K <b>L</b> W <b>G</b> L <b>V</b> C <b>H</b> H <b>Y</b> L <b>P</b> R <b>F</b> I <b>R</b> F <b>E</b> L <b>R</b> A <b>I</b> C <b>K</b> R <b>L</b> A <b>E</b> R <b>I</b> A <b>T</b> R <b>I</b> T <b>A</b> L <b>E</b> S--                                                                                                                                                                                                                                                                                                                                  |            |
| RpBphP1  | (274) | G <b>G</b> -----K <b>L</b> W <b>G</b> L <b>V</b> A <b>C</b> H <b>H</b> Y <b>L</b> P <b>R</b> F <b>I</b> H <b>F</b> E <b>L</b> R <b>A</b> I <b>C</b> E <b>L</b> L <b>A</b> E <b>A</b> I <b>A</b> T <b>R</b> I <b>T</b> A <b>L</b> E <b>S</b> --                                                                                                                                                                                                                                                                                                                        |            |
| iRFP682  | (275) | G <b>E</b> -----R <b>L</b> W <b>G</b> L <b>I</b> V <b>C</b> H <b>H</b> R <b>T</b> P <b>Y</b> Y <b>V</b> D <b>L</b> D <b>G</b> R <b>Q</b> A <b>C</b> E <b>L</b> V <b>A</b> Q <b>V</b> L <b>A</b> W <b>I</b> G <b>V</b> M <b>E</b> E--                                                                                                                                                                                                                                                                                                                                  |            |
| RpBphP2  | (275) | G <b>E</b> -----R <b>L</b> W <b>G</b> L <b>I</b> A <b>C</b> H <b>H</b> R <b>K</b> P <b>N</b> Y <b>V</b> D <b>L</b> D <b>G</b> R <b>Q</b> A <b>C</b> E <b>L</b> V <b>A</b> Q <b>V</b> L <b>A</b> W <b>I</b> G <b>V</b> M <b>E</b> E--                                                                                                                                                                                                                                                                                                                                  |            |
| iRFP670  | (268) | D <b>G</b> -----T <b>L</b> W <b>G</b> L <b>I</b> C <b>H</b> H <b>Y</b> E <b>P</b> R <b>A</b> V <b>F</b> M <b>A</b> Q <b>R</b> V <b>A</b> E <b>M</b> F <b>A</b> D <b>F</b> L <b>S</b> L <b>H</b> F <b>T</b> A <b>A</b> H <b>H</b> Q <b>R</b>                                                                                                                                                                                                                                                                                                                           |            |
| RpBphP6  | (268) | D <b>G</b> -----T <b>L</b> W <b>G</b> L <b>I</b> A <b>C</b> H <b>H</b> Y <b>E</b> P <b>R</b> A <b>V</b> F <b>M</b> A <b>Q</b> R <b>V</b> A <b>E</b> M <b>F</b> A <b>D</b> F <b>F</b> S <b>L</b> H <b>F</b> T <b>A</b> A <b>H</b> H <b>Q</b> R                                                                                                                                                                                                                                                                                                                         |            |
| DrBphP   | (280) | G <b>G</b> -----Q <b>L</b> W <b>G</b> L <b>I</b> A <b>C</b> H <b>H</b> Q <b>T</b> P <b>Y</b> V <b>L</b> P <b>D</b> L <b>R</b> T <b>L</b> E <b>S</b> L <b>R</b> G <b>L</b> L <b>S</b> L <b>Q</b> V <b>Q</b> V <b>K</b> E <b>A</b>                                                                                                                                                                                                                                                                                                                                      |            |
| AtPhyA   | (345) | N <b>E</b> E <b>D</b> G <b>E</b> D <b>A</b> P <b>D</b> A <b>T</b> T <b>Q</b> P <b>K</b> R <b>K</b> R <b>L</b> W <b>G</b> L <b>V</b> V <b>C</b> H <b>H</b> T <b>T</b> P <b>R</b> F <b>V</b> F <b>P</b> L <b>R</b> Y <b>A</b> C <b>E</b> F <b>L</b> A <b>Q</b> V <b>F</b> A <b>I</b> H <b>V</b> N <b>K</b> E <b>V</b> E--                                                                                                                                                                                                                                               |            |
| AtPhyB   | (379) | N <b>G</b> N <b>E</b> D <b>D</b> G <b>S</b> ---N <b>V</b> A <b>S</b> G <b>R</b> S <b>S</b> M <b>R</b> L <b>W</b> G <b>L</b> V <b>V</b> C <b>H</b> H <b>T</b> S <b>S</b> R <b>C</b> I <b>P</b> F <b>P</b> L <b>R</b> Y <b>A</b> C <b>E</b> F <b>L</b> M <b>Q</b> A <b>F</b> L <b>Q</b> L <b>N</b> M <b>E</b> L <b>Q</b> --                                                                                                                                                                                                                                             |            |
| Sy Cph1  | (280) | D <b>G</b> -----H <b>L</b> W <b>G</b> L <b>I</b> A <b>C</b> H <b>H</b> Q <b>T</b> P <b>K</b> V <b>I</b> P <b>F</b> E <b>L</b> R <b>K</b> A <b>C</b> E <b>F</b> F <b>G</b> R <b>V</b> V <b>F</b> S <b>N</b> I <b>S</b> A <b>Q</b> E <b>D</b> --                                                                                                                                                                                                                                                                                                                        |            |
| Cl CphA  | (280) | D <b>G</b> -----K <b>L</b> W <b>G</b> L <b>I</b> A <b>C</b> H <b>H</b> Q <b>T</b> P <b>K</b> Y <b>V</b> S <b>Y</b> E <b>F</b> R <b>K</b> A <b>C</b> E <b>F</b> L <b>G</b> R <b>V</b> I <b>F</b> T <b>E</b> I <b>S</b> T <b>R</b> E <b>E</b> --                                                                                                                                                                                                                                                                                                                        |            |
|          |       | GAF domain                                                                                                                                                                                                                                                                                                                                                                                                                                                                                                                                                            |            |

**Supplemental Data File, related to Figure 1.** Sequence alignment of the blue-shifted NIR FPs, their BphP templates and representative bacterial, plant and cyanobacterial phytochromes in the regions of the PAS and GAF domains containing bilin binding Cys residues (in red). BphPs (*Rhodospseudomonas palustris* RpBphP1, RpBphP2 and RpBphP6 and *Deinococcus radiodurans* DrBphP) covalently bind BV via Cys in the PAS domain, whereas plant phytochromes (*Arabidopsis thaliana* AtPhyA and AtPhyB) and cyanobacterial phytochromes (*Synechocystis* Cph1 and *Calothrix* CphA) covalently bind P<sub>680</sub> and P<sub>685</sub> via Cys in the GAF domain. BphP1-FP differs from the PAS-GAF domains of RpBphP1 by the twenty-four amino acid residues in total (marked in blue).
